# Supplementary material
Source: HighWire-hosted journal article supplement (https://drc.bmj.com/content/4/1/e000186)
Supplement: inline-supplementary-material-2 [file inline-supplementary-material-2.pdf]

Supplementary table 1 Prevalence of pre-diabetes and diabetes

| Sex:              | n    | Pre-diabetes (95% CI) | Diabetes (95% CI)   |
|-------------------|------|-----------------------|---------------------|
| Male              | 1130 | 8.3% (7.1%-9.8%)      | 12.9% (11.3%-14.6%) |
| Female            | 2263 | 6.6% (5.5%-7.9%)      | 13.1% (11.6%-14.7%) |
|                   |      | p<0.05                | p>0.05              |
| Age group(years): | n    | Pre-diabetes (95% CI) | Diabetes (95% CI)   |
| 15-24             | 605  | 1.3% (0.8%-2.4%)      | 2.1% (1.3%-3.3%)    |
| 25-34             | 716  | 5.3% (3.9%-7.1%)      | 6.9% (5.3%-8.9%)    |
| 35-44             | 780  | 10.0% (8.0%-12.5%)    | 12.9% (10.6%-15.6%) |
| 45-54             | 732  | 11.9% (9.5%-14.7%)    | 25.0% (21.7%-28.6%) |
| 55-64             | 560  | 14.1% (10.9%-18.0%)   | 32.1% (27.5%-36.9%) |
|                   |      | p<0.05                | p<0.05              |
| Total             | 3393 | 7.4% (6.6%-8.4%)      | 13.0% (11.9%-14.1%) |
